# Supplementary material for: Synthesis and optical and electrochemical properties of water-soluble cationic fluorophores based on bispyridinium and dibenzothiophene-S,S-dioxide
Source: Royal Society of Chemistry journal article supplement (doi:10.1039/c6nj03108k), 2017-01-01
Supplement: c6nj03108k1.pdf [file c6nj03108k1.pdf]

## Supporting Information

# Synthesis, and Optical and Electrochemical Properties of Water-Soluble Cationic Fluorophors Based on Bispyridinium and Dibenzothiophene-S,S-Dioxide

Guiting Chen,<sup>a</sup> Ruifeng He,<sup>a</sup> Wei Yang,<sup>a</sup> Bin Zhang\*<sup>ab</sup>

<sup>a</sup> *Institute of Polymer Optoelectronic Materials and Devices, State Key Laboratory of Luminescent Materials and Devices, South China University of Technology, Guangzhou 510640, China. E-mail: msbzhang@scut.edu.cn*

<sup>b</sup> *Key Laboratory of Optoelectronic Devices and Systems of Ministry of Education and Guangdong Province, College of Optoelectronic Engineering, Shenzhen University, Shenzhen 518060, China*

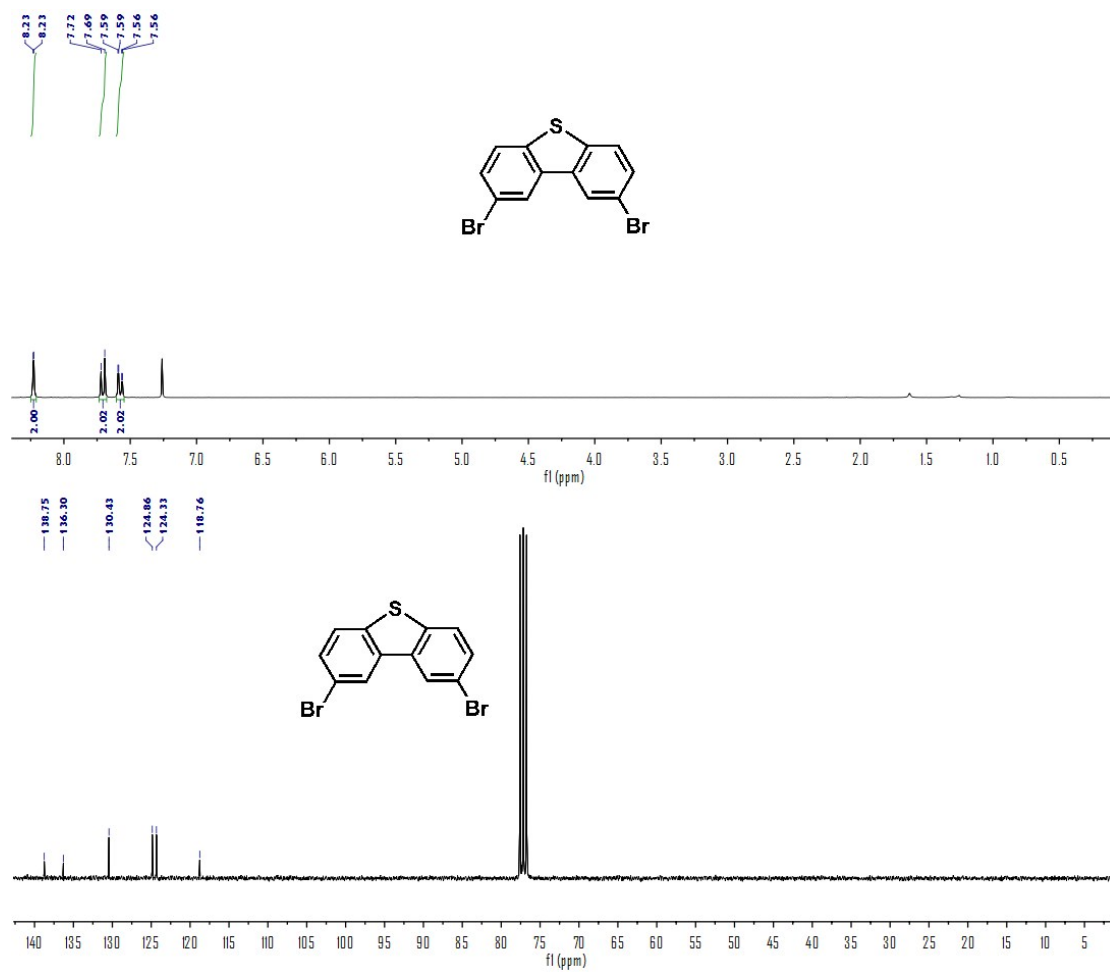

Figure S1. <sup>1</sup>H and <sup>13</sup>C NMR of **1**

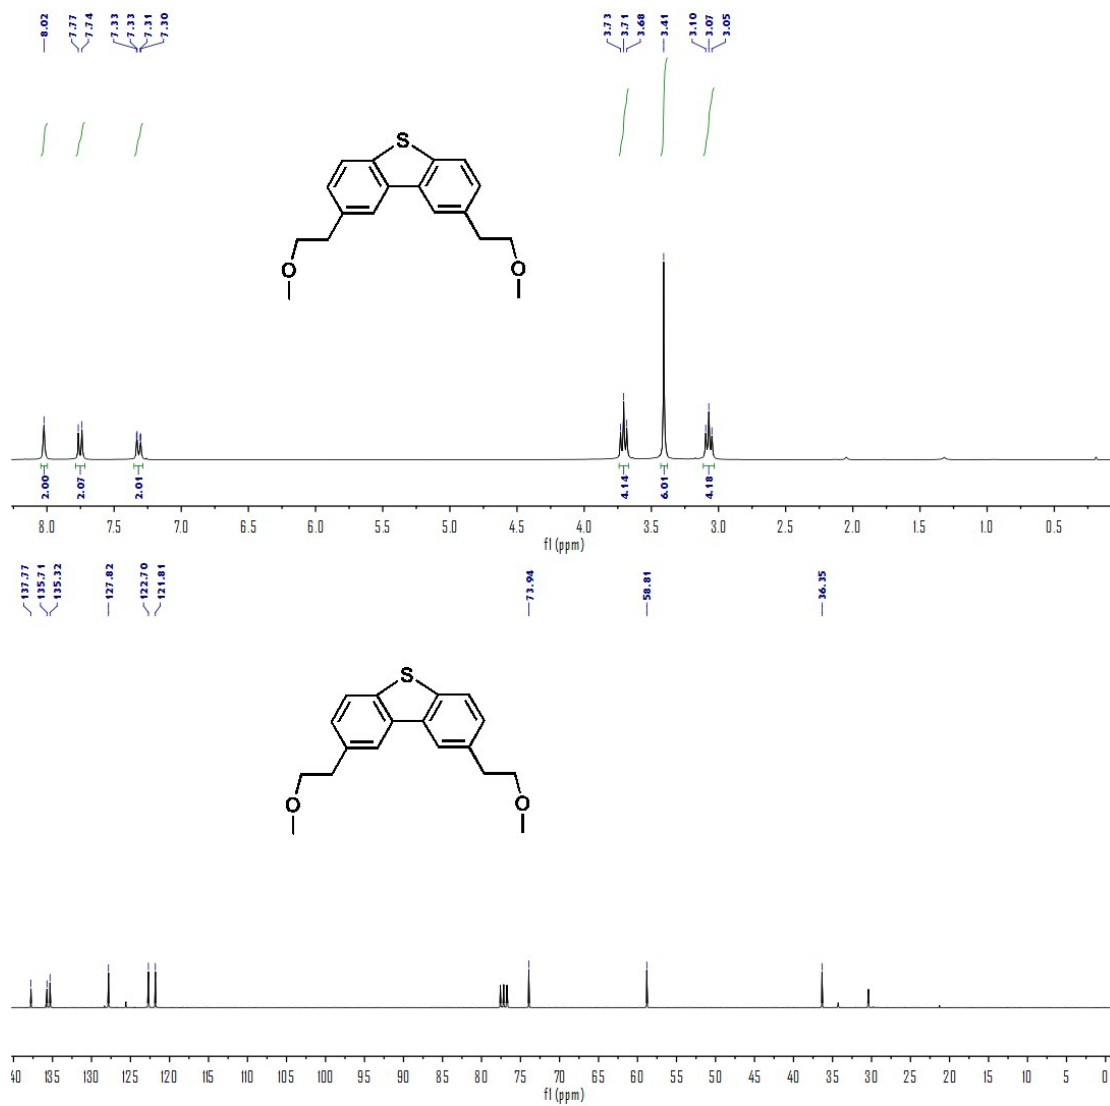

Figure S2. <sup>1</sup>H and <sup>13</sup>C NMR of 2

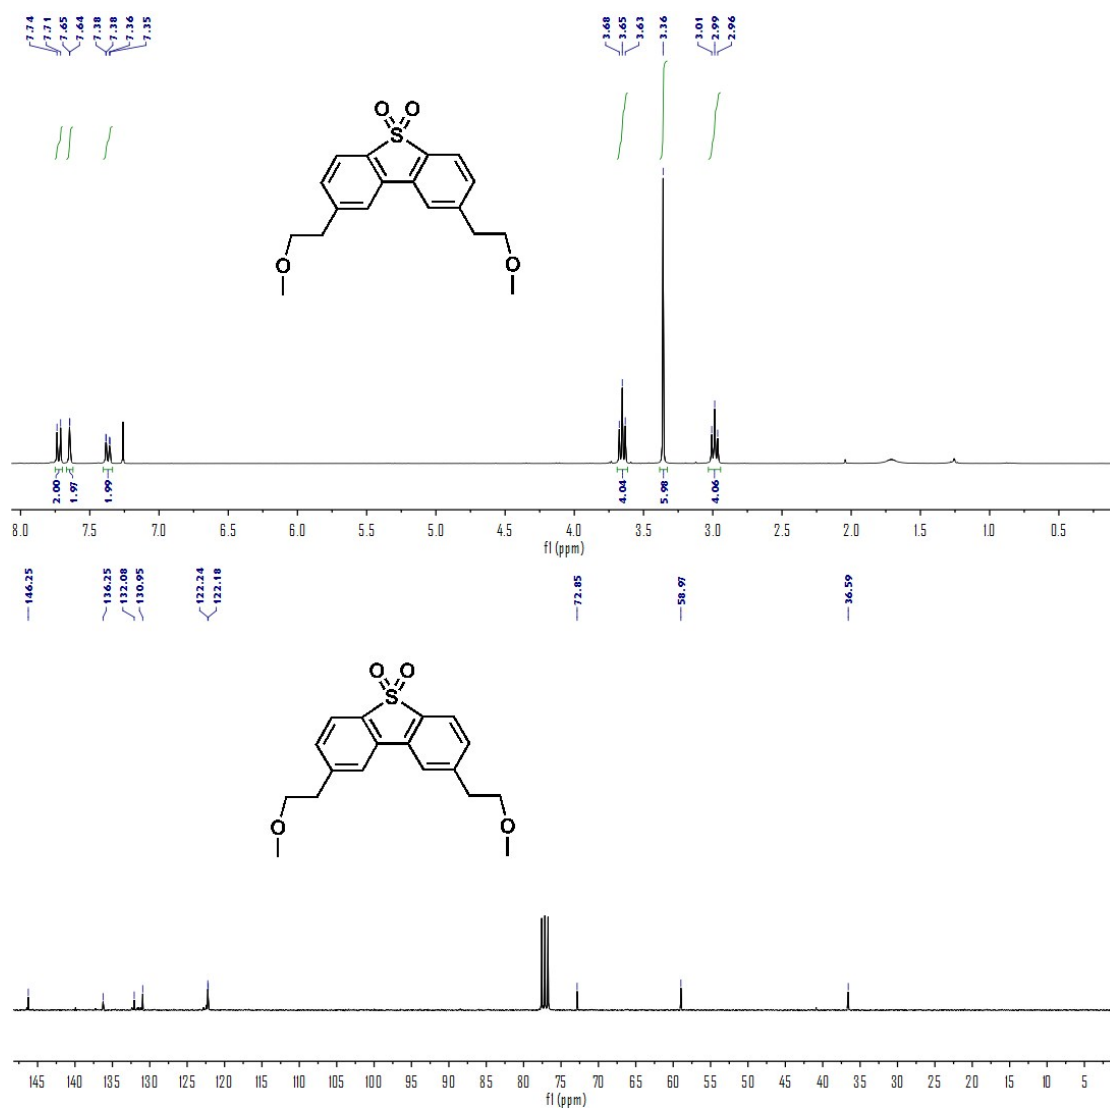

Figure S3. <sup>1</sup>H and <sup>13</sup>C NMR of 3

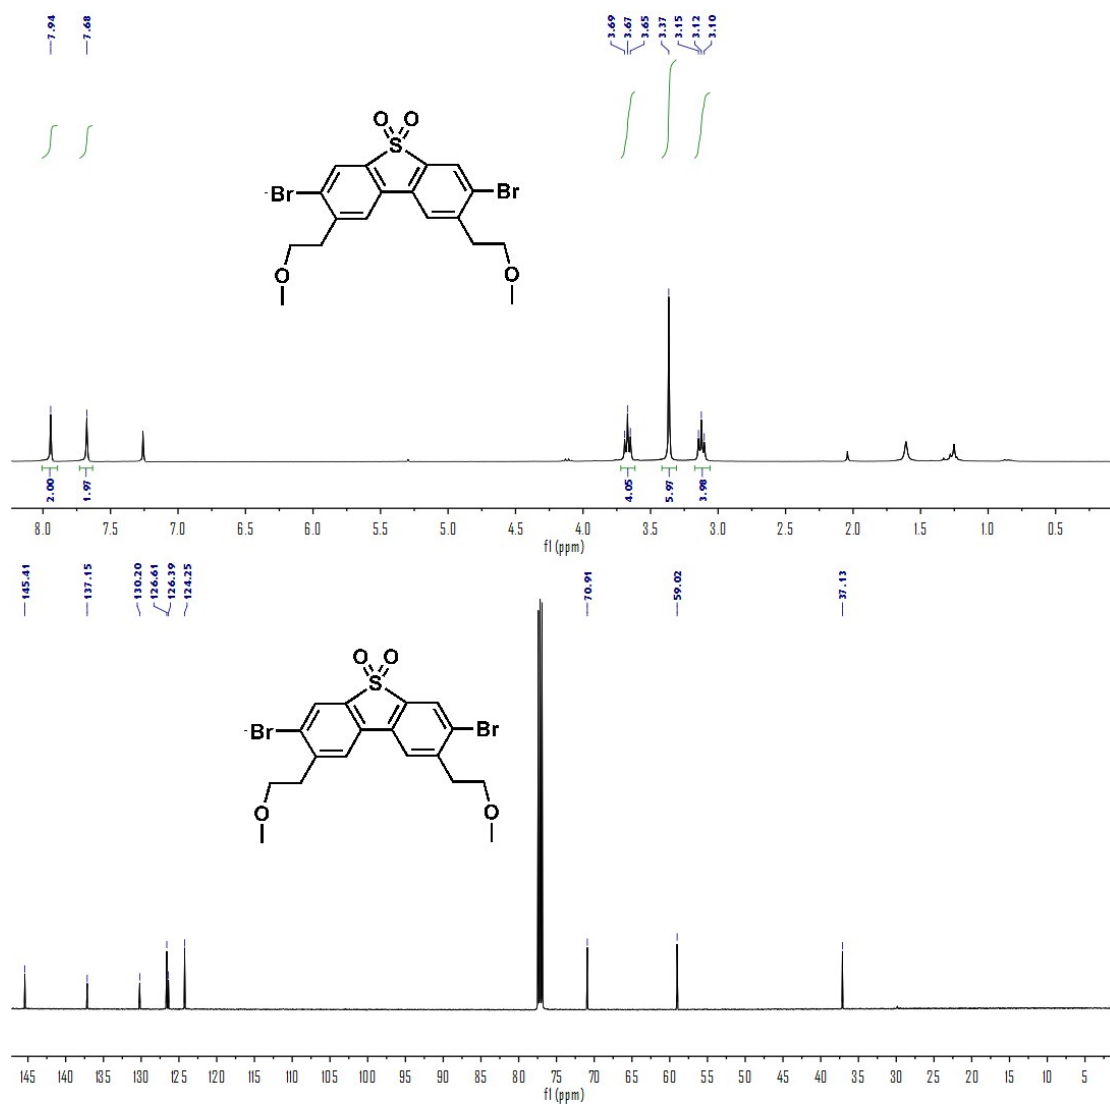

Figure S4. <sup>1</sup>H and <sup>13</sup>C NMR of 4

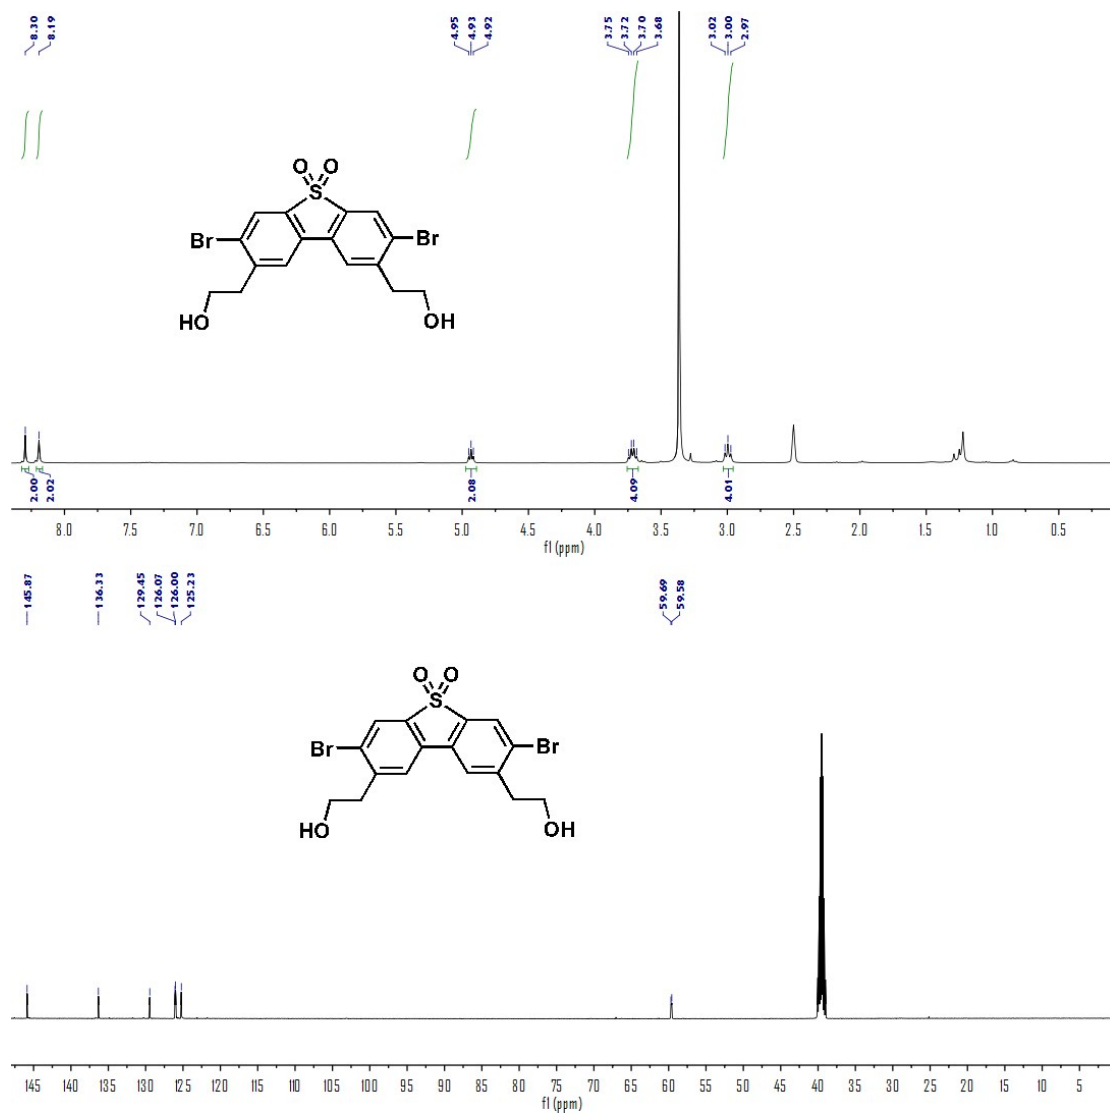

Figure S5. <sup>1</sup>H and <sup>13</sup>C NMR of 5

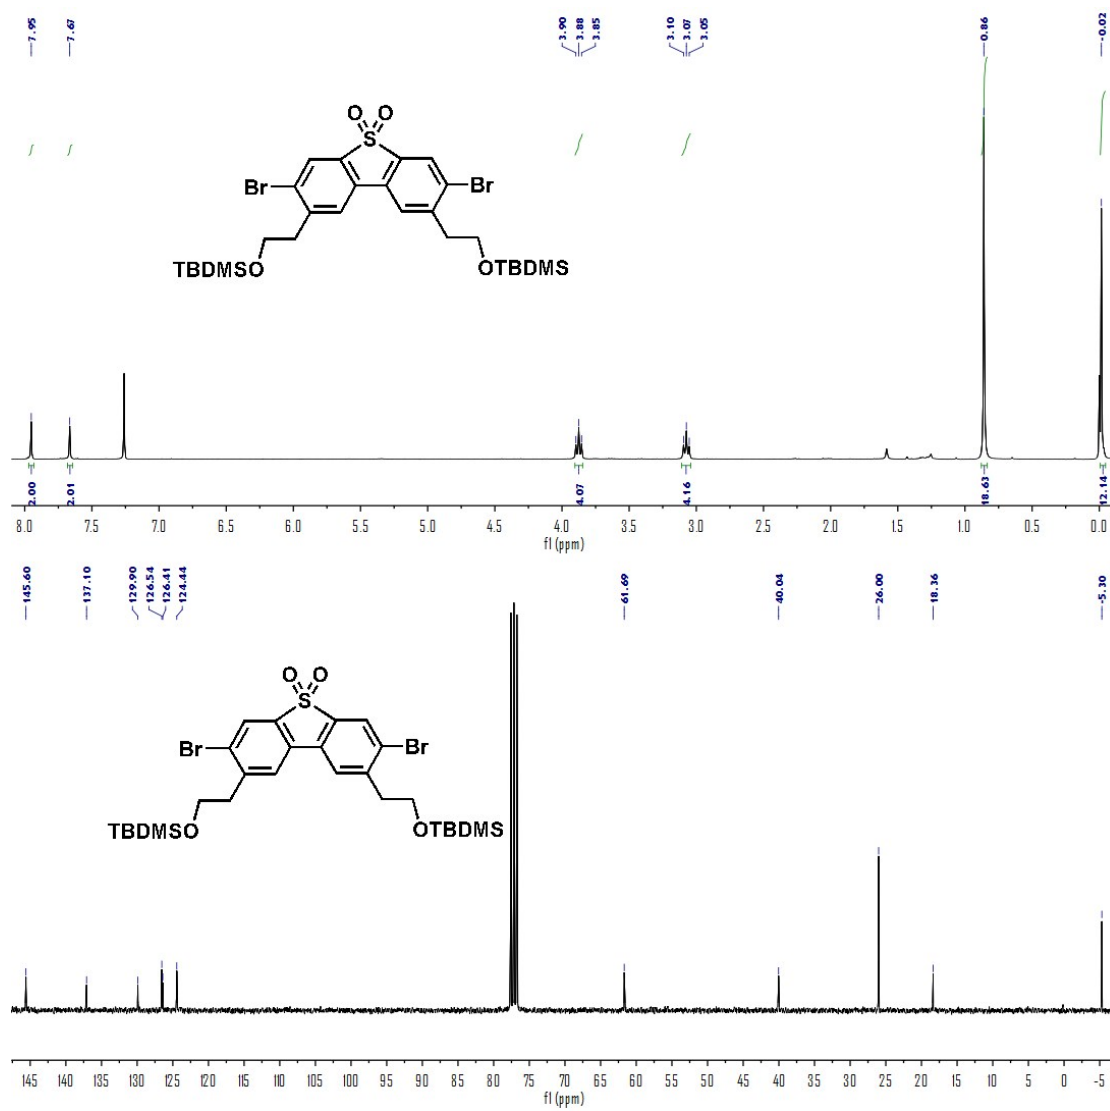

Figure S6. <sup>1</sup>H and <sup>13</sup>C NMR of 6

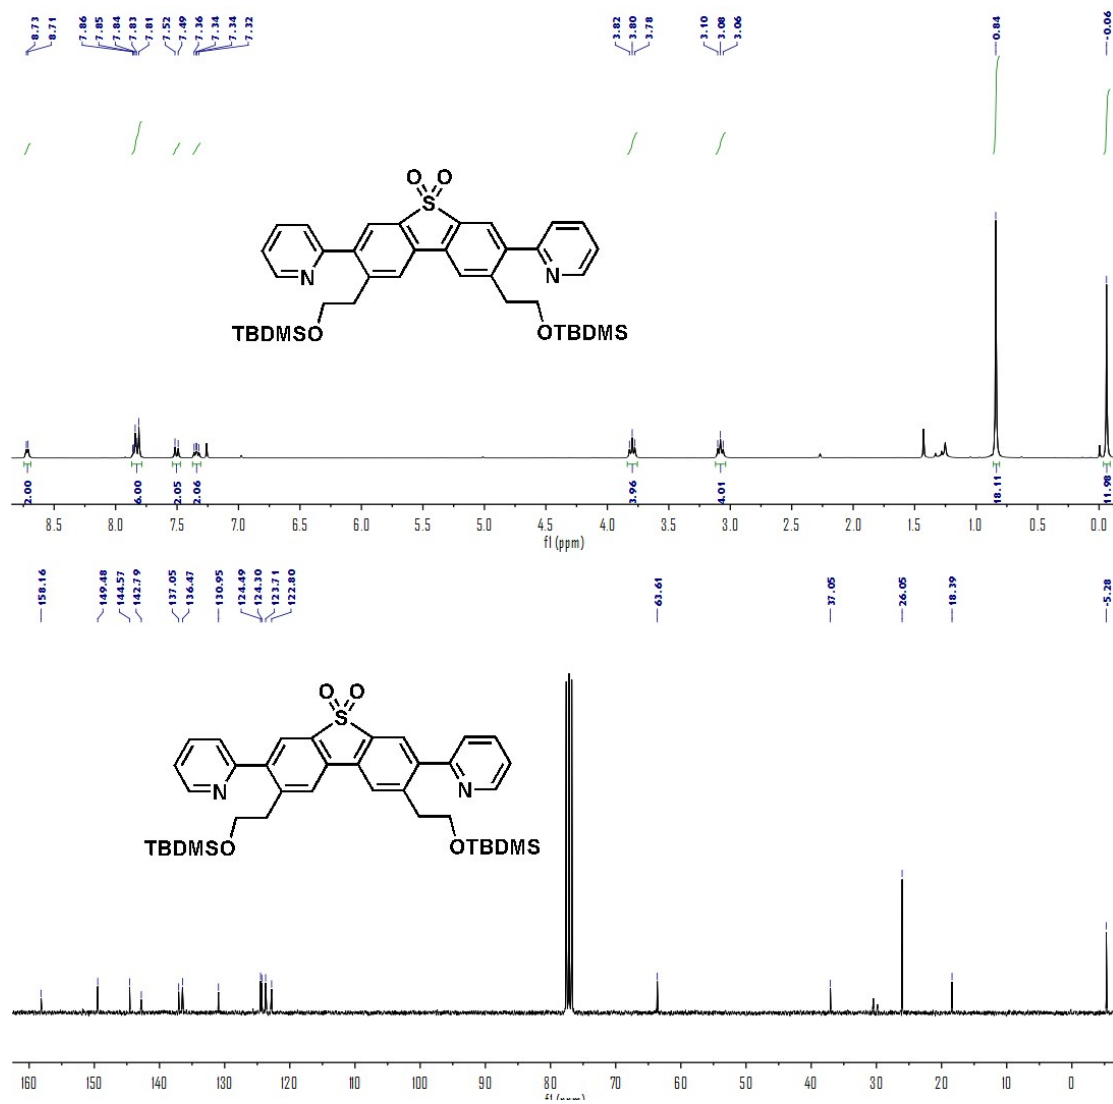

Figure S7. <sup>1</sup>H and <sup>13</sup>C NMR of 8



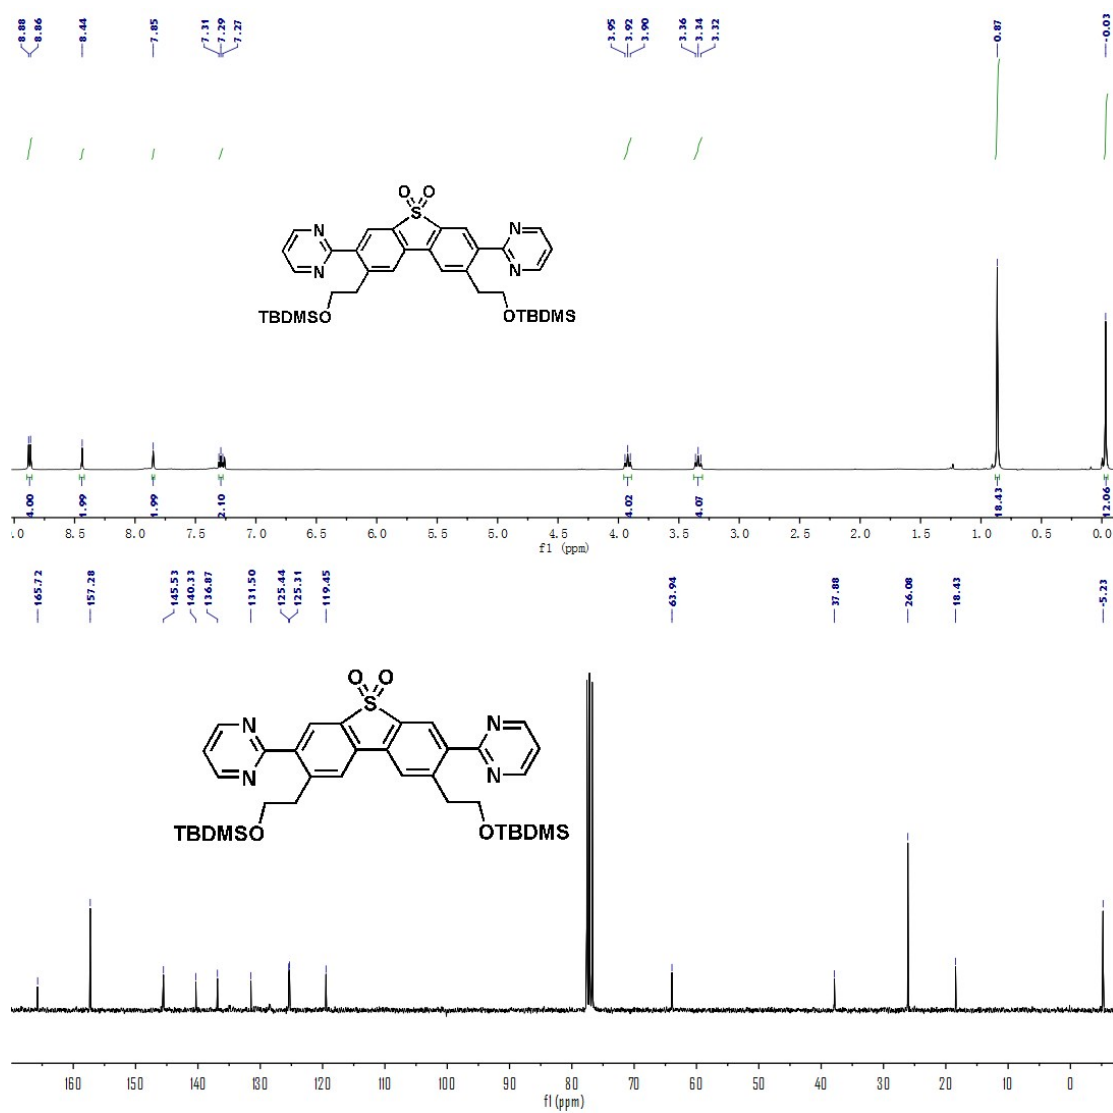

Figure S8. <sup>1</sup>H and <sup>13</sup>C NMR of **9**

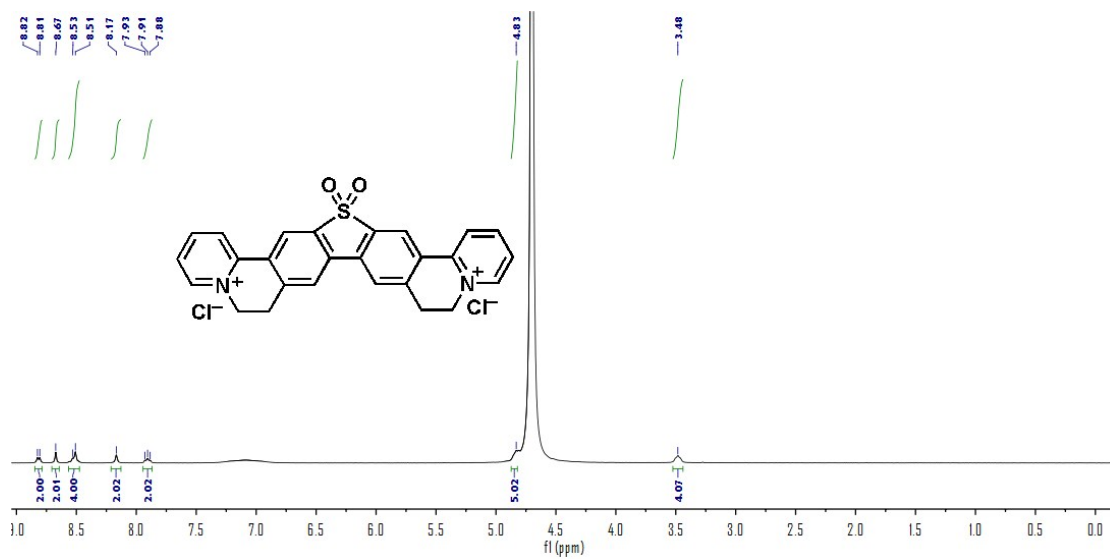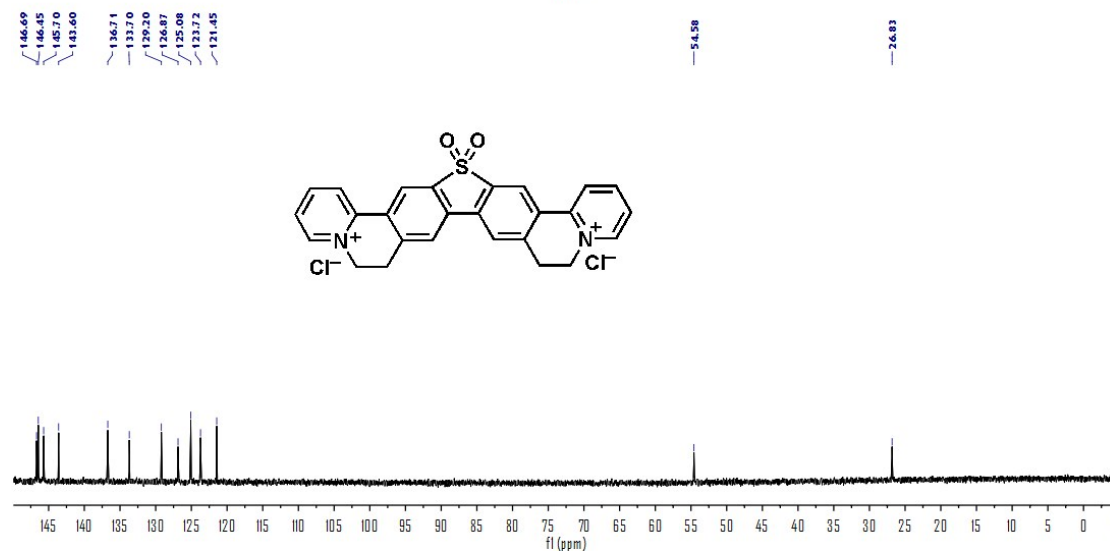

Figure S9. <sup>1</sup>H and <sup>13</sup>C NMR of FSOPyCl

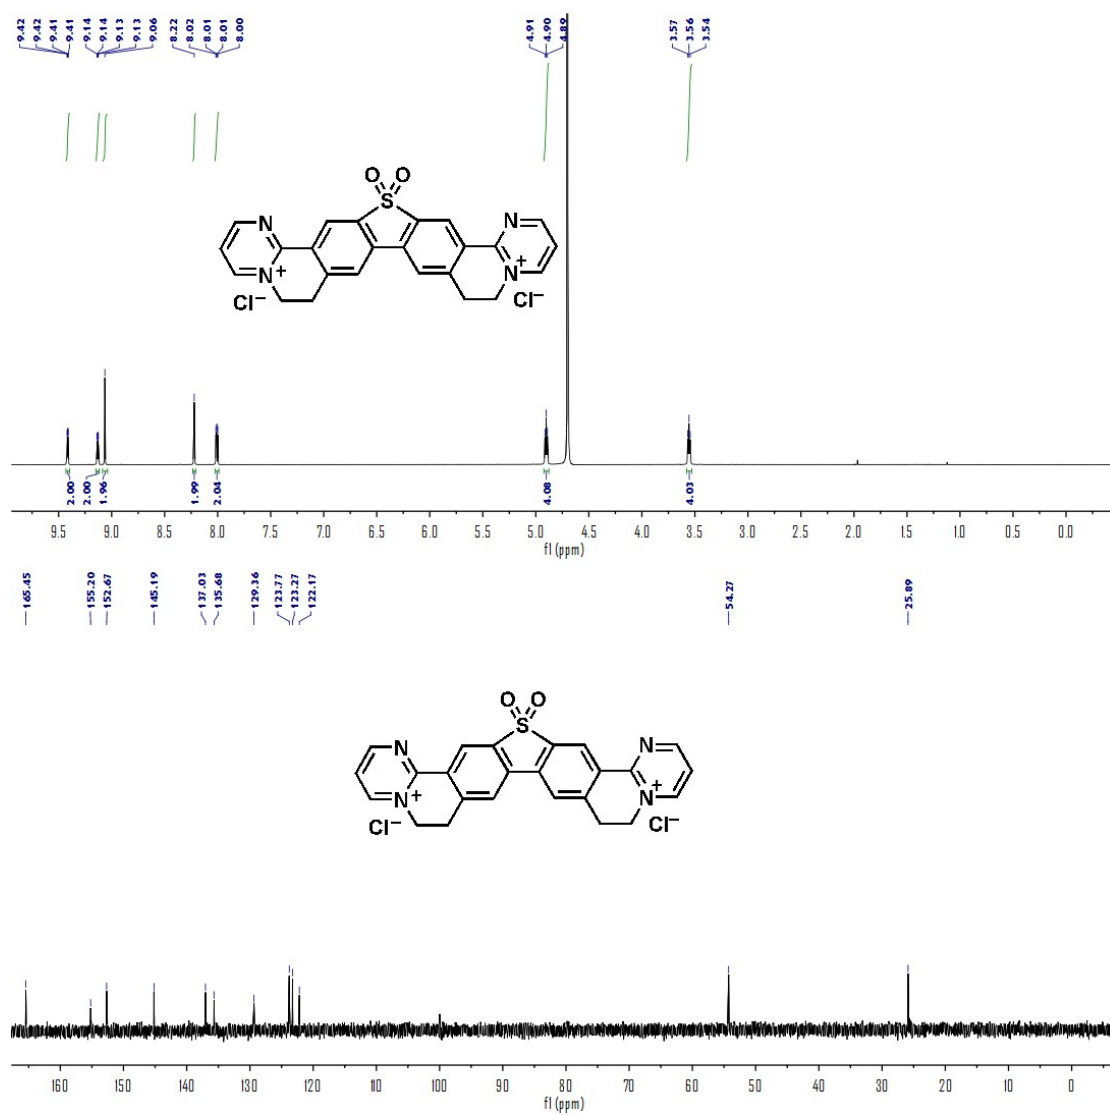

Figure S10. <sup>1</sup>H and <sup>13</sup>C NMR of FSOmiCl
